# Supplementary material for: Comparative Plastid Genomics of Four Pilea (Urticaceae) Species: Insight into Interspecific Plastid Genome Diversity in Pilea
Source: Research Square preprint supplement (doi:10.21203/rs.3.rs-49270/v4), 2020-12-21
Supplement: Supplementary file 1 [file e52cc86a7956d2636cc48e4e.xlsx]

## Sheet: Table S6
Table S4 Repeats (>= 30bp) identified in the four Pilea species.
Species	ID	Repeat types	Repeat length（bp）	Repeat units I start	Repeat units I end	Repeat units II start	Repeat units II end	Repeat interval	E-value	Repeat units I region	Repeat units II region	Repeat units I seq	Repeat units II seq
Pilea glauca	R1	F	30	8272	8301	34669	34698	-2	2.18e-05	LSC	LSC	AAAACGGAAAGAGAGGGATTCGAACCCTCG	AAAAAGGAGAGAGAGGGATTCGAACCCTCG
Pilea glauca	R2	P	30	8275	8304	44346	44375	-1	5.02e-07	LSC	LSC	ACGGAAAGAGAGGGATTCGAACCCTCGGTA	TACCGAGGGTTCGAATCCCTCTCTTTCCAT
Pilea glauca	R3	P	30	9585	9614	93818	93847	-3	0.000611	LSC	IRb	AAAGTCTCATGTTCGGTTTTGAATTAGAGA	TCTCTCATTCAAAACCGTGCATGAGACTTT
Pilea glauca	R4	F	30	9585	9614	140026	140055	-3	0.000611	LSC	IRa	AAAGTCTCATGTTCGGTTTTGAATTAGAGA	AAAGTCTCATGCACGGTTTTGAATGAGAGA
Pilea glauca	R5	F	30	9666	9695	35712	35741	-3	0.000611	LSC	LSC	ACGATGCGGGTTCGATTCCCGCTACCCGCT	AAGATGCGGGTTCGATTCCCGCTATCCGCC
Pilea glauca	R6	F	30	12131	12160	12158	12187	-3	0.000611	LSC	LSC	TAATGAGCCTGTCTTCTCTTTTCTATTTCT	TCTTGAGCCTGTCTTCTCGTTTCTATTTCT
Pilea glauca	R7	P	30	34672	34701	44346	44375	-3	0.000611	LSC	LSC	AAGGAGAGAGAGGGATTCGAACCCTCGATA	TACCGAGGGTTCGAATCCCTCTCTTTCCAT
Pilea glauca	R8	P	30	35431	35460	35466	35495	-1	5.02e-07	LSC	LSC	ATTTAAATGAATATGTATTCAATAATTATA	TATAATTATTGAATACATATTCATTTAAAG
Pilea glauca	R9	F	32	37942	37973	40166	40197	-3	4.67e-05	LSC	LSC	GCAATAGCTAAATGATGATGAGCAATATCAGT	GCAATAGCTAAATGATGATGTGCGATATCGGT
Pilea glauca	R10	F	37	42920	42956	96927	96963	0	3.4e-13	LSC	IRb	CAGAACCGTACATGAGATTTTCATCTCATACGGCTCC	CAGAACCGTACATGAGATTTTCATCTCATACGGCTCC
Pilea glauca	R11	P	37	42920	42956	136910	136946	0	3.4e-13	LSC	IRa	CAGAACCGTACATGAGATTTTCATCTCATACGGCTCC	GGAGCCGTATGAGATGAAAATCTCATGTACGGTTCTG
Pilea glauca	R12	F	38	42920	42957	118198	118235	-1	9.7e-12	LSC	SSC	CAGAACCGTACATGAGATTTTCATCTCATACGGCTCCT	CAGAACCGTACATGAGATTTTCATTTCATACGGCTCCT
Pilea glauca	R13	P	35	42921	42955	74042	74076	-3	9.63e-07	LSC	LSC	CAGAACCGTACATGAGATTTTCATCTCATACGGCTCC	GAGCCGTACGAGATGAAATTCTCATATACGGTTCT
Pilea glauca	R14	F	30	53302	53331	53332	53361	-2	2.18e-05	LSC	LSC	CAGTTTCGTTGGTAACAAACATCCAACCGC	CAGTTTCGTTGGTAACAAACATCCAACTGA
Pilea glauca	R15	F	30	58110	58139	58120	58149	-3	0.000611	LSC	LSC	TTAAGTATAATTATATATAATTATATATAA	TTATATATAATTATATATAATTATATATGA
Pilea glauca	R16	P	30	58115	58144	58115	58144	0	5.58e-09	LSC	LSC	TATAATTATATATAATTATATATAATTATA	TATAATTATATATAATTATATATAATTATA
Pilea glauca	R17	P	30	58120	58149	58120	58149	-2	2.18e-05	LSC	LSC	TTATATATAATTATATATAATTATATATGA	TTATATATAATTATATATAATTATATATGA
Pilea glauca	R18	P	30	62412	62441	62482	62511	-2	2.18e-05	LSC	LSC	AAAAATAATATGATTATTAAGAACTCAACG	CGTTGAGTTCTTAATAATCATATTATGTCT
Pilea glauca	R19	R	31	63756	63786	63756	63786	-2	5.84e-06	LSC	LSC	CAACCAATAAAAAAAAAAAAAAATAAGCAAC	CAACCAATAAAAAAAAAAAAAAATAAGCAAC
Pilea glauca	R20	P	30	63984	64013	63984	64013	0	5.58e-09	LSC	LSC	CTACTATATATTAGTACTAATATATAGTAG	CTACTATATATTAGTACTAATATATAGTAG
Pilea glauca	R21	P	35	74042	74076	96928	96962	-3	9.63e-07	LSC	IRb	GAGCCGTACGAGATGAAATTCTCATATACGGTTCT	AGAACCGTACATGAGATTTTCATCTCATACGGCTC
Pilea glauca	R22	F	35	74042	74076	136911	136945	-3	9.63e-07	LSC	IRa	GAGCCGTACGAGATGAAATTCTCATATACGGTTCT	GAGCCGTATGAGATGAAAATCTCATGTACGGTTCT
Pilea glauca	R23	P	25356	82663	108018	125855	151210	0	0	IRb	IRa	AGACGCTCGGGACCATGTTACTATTATTTCTTTTTCCGCTTTTGTGTTAAGCATATTTAT TTTTCTTAATAAAGGATTGGCTACAAAAGGATTTTTTTTTAGTGAACGTGCCACAATTAA TTACTCCTGTTTTTTTTATAAAAACGAAGAAAGAAATTCTATTTTCTCTCCTATTTACTA CGGCGACGAAGAATCAAATTATCACTATATTTATTCCTTTTTCTACTTCTTCTTCCAAGT GCAGGATAACCCCAAGGAGTTGCGGGTTTTTTTCTACCAATTGGGGCCCTCCCTTCACCA CCCCCATGGGGGTGGTCTACAGGGTTCATAACTACCCCTCTTACTACAGGACGCTTACCT AGCCAACATTTAGATCCGGCTCTACCCAAACTT…	GGTGGAAATCTTTTTTTTCTTTAAATATTTTTAACTCGGTGAATCCCTCTTGTTCCTGTT TAGTCCCCCTCGTTTCTGAAGTTGTTTCTATTTCTAGATCTGTTTCTTCCTCTCTTTTTG AGATTTCTCTCAGTTTCTCAGTAAAAATGGGTGAGTCTAAATAGTAGACACAGGTAATAA ATAAAAGAATACTAAAGATTCGAGCCCTAAAATTTCTCAATTTTGACACTAGGTACTTAT TAGATCTAATAGAATCATTTTTCTGTATCCAGACTAATACCAATCCAACCCATTTCATGA AAAAAATGTGACCAATTAACCAACCAACAAAACTACTTGTTACAAATAAAATCTTGTTGT TGCATCGAAACATATAAATGTTGACTAATCTGA…
Pilea glauca	R24	P	31	94283	94313	94283	94313	-3	0.000169	IRb	IRb	AATGAATCTCTTTATCATAAAGAGATTCGTT	AATGAATCTCTTTATCATAAAGAGATTCGTT
Pilea glauca	R25	F	31	94283	94313	139560	139590	-3	0.000169	IRb	IRa	AATGAATCTCTTTATCATAAAGAGATTCGTT	AACGAATCTCTTTATGATAAAGAGATTCATT
Pilea glauca	R26	F	37	96927	96963	118198	118234	-1	3.78e-11	IRb	SSC	CAGAACCGTACATGAGATTTTCATCTCATACGGCTCC	CAGAACCGTACATGAGATTTTCATTTCATACGGCTCC
Pilea glauca	R27	P	46	115152	115197	115152	115197	-2	1.21e-14	SSC	SSC	AAAAGCGCGTACTCAAAAAAATAGATTTTTTTGAGTACGCGCTTTT	AAAAGCGCGTACTCAAAAAAATAGATTTTTTTGAGTACGCGCTTTT
Pilea glauca	R28	P	37	118198	118234	136910	136946	-1	3.78e-11	SSC	IRa	CAGAACCGTACATGAGATTTTCATTTCATACGGCTCC	GGAGCCGTATGAGATGAAAATCTCATGTACGGTTCTG
Pilea glauca	R29	P	36	118544	118579	118544	118579	-2	7.72e-09	SSC	SSC	AATTCATAGCATAATTTATCAATTATGCTATGAATT	AATTCATAGCATAATTTATCAATTATGCTATGAATT
Pilea glauca	R30	P	31	139560	139590	139560	139590	-3	0.000169	IRa	IRa	AACGAATCTCTTTATGATAAAGAGATTCATT	AACGAATCTCTTTATGATAAAGAGATTCATT
Pilea mollis	R1	F	30	8197	8226	34473	34502	-2	2.17e-05	LSC	LSC	AAAACGGAAAGAGAGGGATTCGAACCCTCG	AAAAAGGAGAGAGAGGGATTCGAACCCTCG
Pilea mollis	R2	P	30	8200	8229	44140	44169	-1	4.98e-07	LSC	LSC	ACGGAAAGAGAGGGATTCGAACCCTCGGTA	TACCGAGGGTTCGAATCCCTCTCTTTCCAT
Pilea mollis	R3	P	30	9504	9533	93214	93243	-3	0.000606	LSC	IRb	AAAGTCTCATGTTCGGTTTTGAATTAGAGA	TCTCTCATTCAAAACCGTGCATGAGACTTT
Pilea mollis	R4	F	30	9504	9533	139408	139437	-3	0.000606	LSC	IRa	AAAGTCTCATGTTCGGTTTTGAATTAGAGA	AAAGTCTCATGCACGGTTTTGAATGAGAGA
Pilea mollis	R5	F	30	9585	9614	35495	35524	-3	0.000606	LSC	LSC	ACGATGCGGGTTCGATTCCCGCTACCCGCT	AAGATGCGGGTTCGATTCCCGCTATCCGCC
Pilea mollis	R6	P	30	34476	34505	44140	44169	-3	0.000606	LSC	LSC	AAGGAGAGAGAGGGATTCGAACCCTCGATA	TACCGAGGGTTCGAATCCCTCTCTTTCCAT
Pilea mollis	R7	F	32	37725	37756	39949	39980	-3	4.63e-05	LSC	LSC	GCAATAGCTAAATGATGATGAGCAATATCAGT	GCAATAGCTAAATGATGATGTGCGATATCGGT
Pilea mollis	R8	F	37	42712	42748	96318	96354	0	3.38e-13	LSC	IRb	CAGAACCGTACATGAGATTTTCATCTCATACGGCTCC	CAGAACCGTACATGAGATTTTCATCTCATACGGCTCC
Pilea mollis	R9	P	37	42712	42748	136297	136333	0	3.38e-13	LSC	IRa	CAGAACCGTACATGAGATTTTCATCTCATACGGCTCC	GGAGCCGTATGAGATGAAAATCTCATGTACGGTTCTG
Pilea mollis	R10	F	38	42712	42749	117578	117615	-1	9.62e-12	LSC	SSC	CAGAACCGTACATGAGATTTTCATCTCATACGGCTCCT	CAGAACCGTACATGAGATTTTCATTTCATACGGCTCCT
Pilea mollis	R11	P	35	42713	42747	73441	73475	-3	9.55e-07	LSC	LSC	AGAACCGTACATGAGATTTTCATCTCATACGGCTC	GAGCCGTACGAGATGAAATTCTCATATACGGTTCT
Pilea mollis	R12	F	30	58513	58542	58540	58569	-3	0.000606	LSC	LSC	AACTGGAAACAATTGATGAATTACTCCAAC	AACTGTAAACAATTGATGAATTACTCCTAA
Pilea mollis	R13	P	30	61852	61881	61922	61951	-3	0.000606	LSC	LSC	AAAAAGAATATGATTATTAAGAACTCAACG	CGTTGAGTTCTTAATAATCATATTATGTCT
Pilea mollis	R14	P	35	73441	73475	96319	96353	-3	9.55e-07	LSC	IRb	GAGCCGTACGAGATGAAATTCTCATATACGGTTCT	AGAACCGTACATGAGATTTTCATCTCATACGGCTC
Pilea mollis	R15	F	35	73441	73475	136298	136332	-3	9.55e-07	LSC	IRa	GAGCCGTACGAGATGAAATTCTCATATACGGTTCT	GAGCCGTATGAGATGAAAATCTCATGTACGGTTCT
Pilea mollis	R16	P	25330	82064	107393	125258	150587	0	0	IRb	IRa	AGACGCTCGGGACCATGTTACTATTATTTCTTTTTCCGCTTTTGTGTTAAGCATATTTAT TTTTCTTAATAAAGGATTGGCTACAAAAGGATTTTTTTTTAGTGAACGTGCCACAATTAA TTACTCCTGTTTTTTTTATAAAAACGAAGAAAGAAATTCTATTTTCTCTCCTATTTACTA CGGCGACGAAGAATCAAATTATCACTATATTTATTCCTTTTTCTACTTCTTCTTCCAAGT GCAGGATAACCCCAAGGAGTTGCGGGTTTTTTTCTACCAATTGGGGCCCTCCCTTCACCA CCCCCATGGGGATGGTCTACAGGGTTCATAACTACCCCTCTTACTACAGGACGCTTACCT AGCCAACATTTAGATCCGGCTCTACCCAAACTT…	ACGGTGGAAATCTTTTTTTTCTTTAAATATTTTTAACTCGGTGAATCCCTCTTGTTCCTG TTTAGTCCCCCTCGTTTCTGAAGTTGTTTCTATTTCTAGATCTGTTTCTTCCTCTCTTTT TGAGATTTCTCTCAGTTTCTCAGTAAAAATGGGTGAGTCTAAATAGTAGACACAGGTAAT AAATAAGAGAATACTAAAGATTCGAGCCCTAAAATTTCTCAATTTTGACACTAGGTACTT ATTAGATCTAATAGAATCATTTTTCTGTATCCAGACTAATACCAATCCAACCCATTTCAT GAAAAAAATGTGACCAATTAACCAACCAACAAAACTACTTGTTACAAATAACATCTTGTT GTTGCATCGAAACATATAAATGTTGACTAATCT…
Pilea mollis	R17	P	31	93679	93709	93679	93709	-3	0.000168	IRb	IRb	AATGAATCTCTTTATCATAAAGAGATTCGTT	AATGAATCTCTTTATCATAAAGAGATTCGTT
Pilea mollis	R18	F	31	93679	93709	138942	138972	-3	0.000168	IRb	IRa	AATGAATCTCTTTATCATAAAGAGATTCGTT	AACGAATCTCTTTATGATAAAGAGATTCATT
Pilea mollis	R19	F	37	96318	96354	117578	117614	-1	3.75e-11	IRb	SSC	CAGAACCGTACATGAGATTTTCATCTCATACGGCTCC	CAGAACCGTACATGAGATTTTCATTTCATACGGCTCC
Pilea mollis	R20	P	46	114537	114582	114537	114582	0	1.29e-18	SSC	SSC	AAAAGCGCGTACTCAAAAAAATATATTTTTTTGAGTACGCGCTTTT	AAAAGCGCGTACTCAAAAAAATATATTTTTTTGAGTACGCGCTTTT
Pilea mollis	R21	P	37	117578	117614	136297	136333	-1	3.75e-11	SSC	IRa	CAGAACCGTACATGAGATTTTCATTTCATACGGCTCC	GGAGCCGTATGAGATGAAAATCTCATGTACGGTTCTG
Pilea mollis	R22	P	36	117933	117968	117933	117968	-2	7.66e-09	SSC	SSC	AATTCATAGCATAATTCATCAATTATGCTATGAATT	AATTCATAGCATAATTCATCAATTATGCTATGAATT
Pilea mollis	R23	P	31	138942	138972	138942	138972	-3	0.000168	IRa	IRa	AACGAATCTCTTTATGATAAAGAGATTCATT	AACGAATCTCTTTATGATAAAGAGATTCATT
Pilea peperomioides	R1	P	44	6370	6413	6370	6413	0	2.11e-17	LSC	LSC	TTATCTATTTTAATAGATATATATATATCTATTAAAATAGATAA	TTATCTATTTTAATAGATATATATATATCTATTAAAATAGATAA
Pilea peperomioides	R2	P	54	6821	6874	6832	6885	-3	1.35e-17	LSC	LSC	CTAAATCACCCATTCTATTATTATTATATATGCCATATATAATAATAATAGAAT	ATTCTATTATTATTATATATGCCATATATAATAATAATAGAATAGATGATTTAG
Pilea peperomioides	R3	P	33	7932	7964	73031	73063	-3	1.3e-05	LSC	LSC	AAAAAAAAAAAATATATATATATATATACTATA	TATAATATATATATATATATATTTGTATTTTTT
Pilea peperomioides	R4	F	31	7934	7964	46542	46572	-3	0.000172	LSC	LSC	AAAAAAAAAATATATATATATATATACTATA	AAAAAATATATATATATATATATATAATATA
Pilea peperomioides	R5	F	30	8314	8343	34714	34743	-2	2.22e-05	LSC	LSC	AAAACGGAAAGAGAGGGATTCGAACCCTCG	AAAAAGGAGAGAGAGGGATTCGAACCCTCG
Pilea peperomioides	R6	P	35	8319	8353	44571	44605	-3	9.77e-07	LSC	LSC	GGAAAGAGAGGGATTCGAACCCTCGGTACGAAAAA	TTTTGTTTACCGAGGGTTCGAATCCCTCTCTTTCC
Pilea peperomioides	R7	F	30	9708	9737	35761	35790	-3	0.00062	LSC	LSC	ACGATGCGGGTTCGATTCCCGCTACCCGCT	AAGATGCGGGTTCGATTCCCGCTATCCGCC
Pilea peperomioides	R8	P	42	35486	35527	35486	35527	0	3.37e-16	LSC	LSC	TATTAAATTATTATACATTATATAATGTATAATAATTTAATA	TATTAAATTATTATACATTATATAATGTATAATAATTTAATA
Pilea peperomioides	R9	F	40	37991	38030	40215	40254	-2	3.79e-11	LSC	LSC	GCAATAGCTAAATGATGATGAGCAATATCAGTCAGCCATA	GCAATAGCTAAATGATGATGTGCGATATCAGTCAGCCATA
Pilea peperomioides	R10	F	37	42958	42994	97572	97608	0	3.45e-13	LSC	IRb	CAGAACCGTACATGAGATTTTCATCTCATACGGCTCC	CAGAACCGTACATGAGATTTTCATCTCATACGGCTCC
Pilea peperomioides	R11	P	37	42958	42994	138012	138048	0	3.45e-13	LSC	IRa	CAGAACCGTACATGAGATTTTCATCTCATACGGCTCC	GGAGCCGTATGAGATGAAAATCTCATGTACGGTTCTG
Pilea peperomioides	R12	F	38	42958	42995	118919	118956	-1	9.85e-12	LSC	SSC	CAGAACCGTACATGAGATTTTCATCTCATACGGCTCCT	CAGAACCGTACATGAGATTTTCATTTCATACGGCTCCT
Pilea peperomioides	R13	F	35	46542	46576	46544	46578	-3	9.77e-07	LSC	LSC	AAAAAATATATATATATATATATATAATATATATA	AAAATATATATATATATATATATAATATATATATA
Pilea peperomioides	R14	C	31	46547	46577	46548	46578	-1	1.32e-07	LSC	LSC	ATATATATATATATATATATAATATATATAT	TATATATATATATATATATAATATATATATA
Pilea peperomioides	R15	P	60	50301	50360	50301	50360	-2	7.82e-23	LSC	LSC	TATATACTTCTATTTATTCTCTTTATATTGAAATATAAAGAGAATAAATAGAAGTATATA	TATATACTTCTATTTATTCTCTTTATATTGAAATATAAAGAGAATAAATAGAAGTATATA
Pilea peperomioides	R16	P	25336	83293	108628	126992	152327	0	0	IRb	IRa	AGACGCTCGGGACCATGTTACTATTATTTCTTTTTCCGCTTTTGTGTTAAGCATATTTAT TTTTCTTAATAAAGGATTGGCTACAAAAGGATTTTTTTTTAGTGAACGTGCCACAATTAA TTACTCCTATTTTTTTTATAAAAACGAAGAAAGAAATTCTATTTTCTCTCCTATTTACTA CGGCGACGAAGAATCAAATTATCACTATATTTATTCCTTTTTCTACTTCTTCTTCCAAGT GCAGGATAACCCCAAGGAGTTGCGGGTTTTTTTCTACCAATTGGGGCCCTCCCTTCACCA CCCCCATGGGGATGGTCTACAGGGTTCATAACTACCCCTCTTACTACAGGACGCTTACCT AGCCAACATTTAGATCCGGCTCTACCCAAACTT…	TGCGGTGGAAATCTTTTTTTTCTTTAAATATTTTTAACTCGGTGAATCCCTCTTGTTCCT GTTTAGTCCCCCTCGTTTCTGAAGTTTTTTCTATTTCTAGATCTGTTTCTTCCTCGCTTT CTGAGGTTTCTCTCAGTTTCTCAGTAAGAATGGGTGAGTCTAAATAGTAGACACAGGTAA TAAATAAGAGAATACTAAAGATTCGAGCCCTAAAATTTCTTAATTCTGACACTAGGTACT TATTAGATCTAATAGAATTATTTTTCTGTATCCAGACTAATACCAATCCAACCCATTTCA TGAAAAAAATGTGACCAATTAACCAACCAACAAAACTACTTGTTACAAATAACATCTTGT TGTTGCATCGAAACATATAAATGTTGACTAATC…
Pilea peperomioides	R17	F	32	92086	92117	92107	92138	-3	4.74e-05	IRb	IRb	TTCTTACTTCCCAAACAGATCTTCCTACATCT	TTCCTACATCTCAAACAGATCTTCCTACATCT
Pilea peperomioides	R18	P	32	92086	92117	143482	143513	-3	4.74e-05	IRb	IRa	TTCTTACTTCCCAAACAGATCTTCCTACATCT	AGATGTAGGAAGATCTGTTTGAGATGTAGGAA
Pilea peperomioides	R19	P	32	92107	92138	143503	143534	-3	4.74e-05	IRb	IRa	TTCCTACATCTCAAACAGATCTTCCTACATCT	AGATGTAGGAAGATCTGTTTGGGAAGTAAGAA
Pilea peperomioides	R20	P	31	94933	94963	94933	94963	-3	0.000172	IRb	IRb	AATGAATCTCTTTATGATAAAGAGATTCGTT	AATGAATCTCTTTATGATAAAGAGATTCGTT
Pilea peperomioides	R21	F	31	94933	94963	140657	140687	-3	0.000172	IRb	IRa	AATGAATCTCTTTATGATAAAGAGATTCGTT	AACGAATCTCTTTATCATAAAGAGATTCATT
Pilea peperomioides	R22	F	37	97572	97608	118919	118955	-1	3.83e-11	IRb	SSC	CAGAACCGTACATGAGATTTTCATCTCATACGGCTCC	CAGAACCGTACATGAGATTTTCATTTCATACGGCTCC
Pilea peperomioides	R23	P	46	115891	115936	115891	115936	0	1.32e-18	SSC	SSC	AAAAGCGCGTACTCAAAAAAATATATTTTTTTGAGTACGCGCTTTT	AAAAGCGCGTACTCAAAAAAATATATTTTTTTGAGTACGCGCTTTT
Pilea peperomioides	R24	P	37	118919	118955	138012	138048	-1	3.83e-11	SSC	IRa	CAGAACCGTACATGAGATTTTCATTTCATACGGCTCC	GGAGCCGTATGAGATGAAAATCTCATGTACGGTTCTG
Pilea peperomioides	R25	P	36	119263	119298	119263	119298	0	1.38e-12	SSC	SSC	AATTCATATCATAATTCATGAATTATGATATGAATT	AATTCATATCATAATTCATGAATTATGATATGAATT
Pilea peperomioides	R26	P	31	140657	140687	140657	140687	-3	0.000172	IRa	IRa	AACGAATCTCTTTATCATAAAGAGATTCATT	AACGAATCTCTTTATCATAAAGAGATTCATT
Pilea peperomioides	R27	F	32	143482	143513	143503	143534	-3	4.74e-05	IRa	IRa	AGATGTAGGAAGATCTGTTTGAGATGTAGGAA	AGATGTAGGAAGATCTGTTTGGGAAGTAAGAA
Pilea serpyllacea	R1	F	30	8144	8173	34477	34506	-2	2.16e-05	LSC	LSC	AAAATGGAAAGAGAGGGATTCGAACCCTCG	AAAAAGGAGAGAGAGGGATTCGAACCCTCG
Pilea serpyllacea	R2	P	30	8147	8176	44156	44185	0	5.52e-09	LSC	LSC	ATGGAAAGAGAGGGATTCGAACCCTCGGTA	TACCGAGGGTTCGAATCCCTCTCTTTCCAT
Pilea serpyllacea	R3	P	30	9443	9472	93535	93564	-3	0.000605	LSC	IRb	AAAGTCTCATGTTCGGTTTTGAATTAGAGA	TCTCTCATTCAAAACCGTGCATGAGACTTT
Pilea serpyllacea	R4	F	30	9443	9472	139386	139415	-3	0.000605	LSC	IRa	AAAGTCTCATGTTCGGTTTTGAATTAGAGA	AAAGTCTCATGCACGGTTTTGAATGAGAGA
Pilea serpyllacea	R5	F	30	9524	9553	35538	35567	-3	0.000605	LSC	LSC	ACGATGCGGGTTCGATTCCCGCTACCCGCT	AAGATGCGGGTTCGATTCCCGCTATCCGCC
Pilea serpyllacea	R6	P	30	34480	34509	44156	44185	-3	0.000605	LSC	LSC	AAGGAGAGAGAGGGATTCGAACCCTCGATA	TACCGAGGGTTCGAATCCCTCTCTTTCCAT
Pilea serpyllacea	R7	P	40	35255	35294	35255	35294	-2	3.69e-11	LSC	LSC	ATTAAATAATTATACATTATATAAGGTATAATTATTTAAT	ATTAAATAATTATACATTATATAAGGTATAATTATTTAAT
Pilea serpyllacea	R8	F	30	42746	42775	93542	93571	-3	0.000605	LSC	IRb	TTCAAAACCGTACATGAGATTTTCATCTCA	TTCAAAACCGTGCATGAGACTTTCATCTCG
Pilea serpyllacea	R9	P	30	42746	42775	139379	139408	-3	0.000605	LSC	IRa	TTCAAAACCGTACATGAGATTTTCATCTCA	CGAGATGAAAGTCTCATGCACGGTTTTGAA
Pilea serpyllacea	R10	F	34	42751	42784	96641	96674	0	2.16e-11	LSC	IRb	AACCGTACATGAGATTTTCATCTCATACGGCTCC	AACCGTACATGAGATTTTCATCTCATACGGCTCC
Pilea serpyllacea	R11	P	34	42751	42784	136276	136309	0	2.16e-11	LSC	IRa	AACCGTACATGAGATTTTCATCTCATACGGCTCC	GGAGCCGTATGAGATGAAAATCTCATGTACGGTT
Pilea serpyllacea	R12	F	35	42751	42785	117436	117470	-2	2.89e-08	LSC	SSC	AACCGTACATGAGATTTTCATCTCATACGGCTCCT	AACCGTACATGATATTTTCATTTCATACGGCTCCT
Pilea serpyllacea	R13	F	102	45172	45273	45272	45373	0	2.47e-52	LSC	LSC	AAAAGAATTCGAAAGAATAATTAGATGAATTGCATCACTATCCCGTCCTTAGTATTATAT AGATATATATTTTATCGTATTTTTATTAAATCTAAAGCTTAA	AAAAGAATTCGAAAGAATAATTAGATGAATTGCATCACTATCCCGTCCTTAGTATTATAT AGATATATATTTTATCGTATTTTTATTAAATCTAAAGCTTAA
Pilea serpyllacea	R14	F	30	53223	53252	53253	53282	-3	0.000605	LSC	LSC	CAGTTTCGTTGGTAACAAATATCCAACCGA	CAGTTTCGTTGGTAACAAACATCCAAATGA
Pilea serpyllacea	R15	F	32	57879	57910	57897	57928	-3	4.62e-05	LSC	LSC	TTATATATTAGTATATCTTTCTATATTAGTAT	TTCTATATTAGTATCTCTTTATATATTAGTAT
Pilea serpyllacea	R16	P	30	62331	62360	62401	62430	-3	0.000605	LSC	LSC	AAAAATAATATGATTATTAAGAACTCAACG	CGTTCAGTTCTTAATAATCATATTATGTCT
Pilea serpyllacea	R17	P	30	63895	63924	63895	63924	-2	2.16e-05	LSC	LSC	CTACTATATATTAGTAGTAATATATAGTAG	CTACTATATATTAGTAGTAATATATAGTAG
Pilea serpyllacea	R18	P	25180	82552	107731	125219	150398	0	0	IRb	IRa	AGACGCTCGGGACCATGTTACTATTATTTGTTTTTCCGCTTTTGTGTTAAGCAGATTTAT TTTTCTTAATAAAGGATTGGCTACAAAAGGATTTTTTTTTAGTGAACGTGCCACAATTAA TTACTCCTGTTTTTTTTTTTATAAAAACGAAGAAAGAAATTCTATTTTCTCTCCTATTTA CTACGGCGACGAAGAATCAAATTATCACTATATTTATTCCTTTTTCTACTTCTTCTTCCA AGTGCAGGATAACCCCAAGGAGTTGCGGGTTTTTTTCTACCAATTGGGGCCCTCCCTTCA CCACCCCCATGGGGATGGTCTACAGGGTTCATAACTACCCCTCTTACTACAGGACGCTTA CCTAGCCAACATTTAGATCCGGCTCTACCCAAA…	ATGGTGGAAATCTTTTTTTTCTTTAAATATTTTTAACTGGGTGAATCCCTCTTGTTCCTG TTTAGTCCCCCTCGTTTCTGAAGTTGTTTCTATTTCTAGATCTGTTTCTTCCTCTCTTGT TGAGATTTCTCTCAGTTTCTGAGTCAAAATGAAAATGGGTGAGTCTAAATAGTAGACACA GGTAATAAATAAGAGAATAGTAAAGATTCGAGCCCTAAAATTTCTCAATTTTGACACTAG GTACTTATTAGATCTAATAGAATCATTTTTCTGTATCCAGACTAATACCAATCCAACCCA TTTCATGAAAAAAATGTGACCAATTAACCAACCAACAAAACTACTTGTTACAAATAACAT CTTGTTGTTGCATCGAAACATATAAATGTTGAC…
Pilea serpyllacea	R19	P	31	94000	94030	94000	94030	-1	1.28e-07	IRb	IRb	AATGAATCTCTTTATCATAAAGAGATTCATT	AATGAATCTCTTTATCATAAAGAGATTCATT
Pilea serpyllacea	R20	F	31	94000	94030	138920	138950	-1	1.28e-07	IRb	IRa	AATGAATCTCTTTATCATAAAGAGATTCATT	AATGAATCTCTTTATGATAAAGAGATTCATT
Pilea serpyllacea	R21	F	37	96638	96674	117433	117469	-2	2.02e-09	IRb	SSC	CAGAACCGTACATGAGATTTTCATCTCATACGGCTCC	CAGAACCGTACATGATATTTTCATTTCATACGGCTCC
Pilea serpyllacea	R22	P	34	110847	110880	110847	110880	0	2.16e-11	SSC	SSC	TAAAAACAAAGTATAATATTATACTTTGTTTTTA	TAAAAACAAAGTATAATATTATACTTTGTTTTTA
Pilea serpyllacea	R23	P	48	114392	114439	114392	114439	0	8.03e-20	SSC	SSC	AAAAGCGCGTACTCAAAAAAATATATATTTTTTTGAGTACGCGCTTTT	AAAAGCGCGTACTCAAAAAAATATATATTTTTTTGAGTACGCGCTTTT
Pilea serpyllacea	R24	P	37	117433	117469	136276	136312	-2	2.02e-09	SSC	IRa	CAGAACCGTACATGATATTTTCATTTCATACGGCTCC	GGAGCCGTATGAGATGAAAATCTCATGTACGGTTCTG
Pilea serpyllacea	R25	P	40	117777	117816	117777	117816	-2	3.69e-11	SSC	SSC	AGAATTGATAGCCTAATTCATCAATTAGGCTATCAATTCT	AGAATTGATAGCCTAATTCATCAATTAGGCTATCAATTCT
Pilea serpyllacea	R26	R	33	123533	123565	123533	123565	-2	4.1e-07	SSC	SSC	TTTTTCTTTCTTTTTCATTTTTTCTTTCTTTTT	TTTTTCTTTCTTTTTCATTTTTTCTTTCTTTTT
Pilea serpyllacea	R27	F	51	124255	124305	124273	124323	-1	1.92e-19	SSC	SSC	CACTCTTACTCTTACGCTCACTCTTACTCTTACGCTCGCTCTTACTCTTAC	CACTCTTACTCTTACGCTCGCTCTTACTCTTACGCTCGCTCTTACTCTTAC
Pilea serpyllacea	R28	F	31	124257	124287	124293	124323	-1	1.28e-07	SSC	SSC	CTCTTACTCTTACGCTCACTCTTACTCTTAC	CTCTTACTCTTACGCTCGCTCTTACTCTTAC
Pilea serpyllacea	R29	F	31	124275	124305	124293	124323	0	1.38e-09	SSC	SSC	CTCTTACTCTTACGCTCGCTCTTACTCTTAC	CTCTTACTCTTACGCTCGCTCTTACTCTTAC
Pilea serpyllacea	R30	P	31	138920	138950	138920	138950	-1	1.28e-07	IRa	IRa	AATGAATCTCTTTATGATAAAGAGATTCATT	AATGAATCTCTTTATGATAAAGAGATTCATT
Note. The largest palindromes repeats (that is the IR regions) are not counted in this paper.
